# Supplementary material
Source: publisher figshare collection journal article supplement (https://rs.figshare.com/ndownloader/files/16387820)
Supplement: Supplementary file 1 [file 16387820]

Supplemental Figure 1. *Parapysche elsis* H-fibroin full length sequence with tryptic peptide coverage

**MRAAILLILFCSLQVSYTHNTKIVLTGAKGKHDTNVIGKLSDFLTHGHLDQNCGKHERVLQGDDIIETNAKGEIIEKITSRKK**FSPMMTPNLSVS**R**YQT**K**T**R**VL**K**QL**K**EILTDDDSESFSVSLSNEDESTETIV**K**TITIVQEIP**K**HG**K**G**R**GHA**K**E**K**IYEEETVI**KK**HGLHAGGAAIVGGASSGGLGSLGDSALIDGLGPLGLGPHGHGPHGHGPYGHGPYGPVAGIGSLGDSGIIDGLGPLGLGPHG**R**YGGV**R**HP**R**G**R**VA**K**SVSVSYE**R**IVTPTVIT**K**IH**KS**V**S**V**SR**EAPII**RRR**PVIIS**R**P**R**VA**K**SVSVSYE**R**IVTPTIIT**K**FH**KS**V**S**V**SR**EAPVI**RRR**PVIIS**R**P**R**VA**K**SVSVSYE**R**IVTPTVIT**R**YSASASVS**R**E**RR**PIY**RR**PIVTYS**R**SVSVSTEG**RR**GPWSGITGHGPLGHGVHG**R**HGGLGPLGSLAGIG**S**LGD**S**GILDGLGPHGLGPHGHGLHGP**R**GGLGPLGSLGGIG**S**LGD**S**GIIDGLGPLGHG**R**HGHGLHGPHG**R**HG**R**GGSGSWSSEGPGGIYGPGGIYGPGGVYGTDGGYYPDGLYGDSGVVDGYGPYGHYGGV**R**HP**R**G**K**VS**K**SASVSYEQIVGPTVIT**R**YSASASVS**R**E**RR**PIY**RR**PVIVS**R**P**R**VA**K**SVSVSYE**R**IVTPTVIT**R**YSASASVS**R**E**RR**PIY**RR**PIVTYS**R**SVSVSTEG**RR**GPWSGITGLGDSGIVDGWGPHGHG**R**HGHGPLGHGLHG**R**HGGLGPLGSLAGIGSLGDSGIVDGLGPLGLGP**R**GL**RR**GG**RR**GGSGSWSSEGPGGIYGPGGIYGPGGVYGTDGGYYPDGLYGDSGVVDGYGPYGHYGGV**R**HP**R**G**K**VS**K**SASVSYEQIVGPTVIT**R**YSASASVS**R**E**RR**PIY**RR**PIVTYS**R**SVSVSTEG**RR**GPWSGITGLGDSGIVDGWGPHGHG**R**HGHGPLGHGLHG**R**HGGLGPLGSLAGIGSLGDSGIVDGLGPLGLGP**R**GL**RR**GG**RR**GGSGSWSSEGPGGIYGPGGIYGPGGVYGTDGGYYPDGLYGDSGVVDGYGPYGHYGGV**R**HP**R**G**K**VS**K**SASVSYEQIVGPTVIT**R**YSASASVS**R**E**RR**PIY**RR**PIVTYS**R**SVSVSTEG**RR**GPWSGITGLGDSGIVDGWGPHGHG**R**HGHGPLGHGLHG**R**HGGLGPLGSLAGIGSLGDSGIVDGLGPLGLGP**R**GL**RR**GG**RR**GGSGSWSSEGPGGIYGPGGIYGPGGVYGTDGGYYPDGLYGDSGVVDGYGPYGHYGGV**R**HP**R**G**K**VS**K**SASVSYEQIVGPTVIT**R**YSASASVS**R**E**RR**PIY**RR**PVIVS**R**P**R**VA**K**SVSVSYE**R**IVTPTVIT**R**YSASASVS**R**E**RR**PIY**RR**PIVTYS**R**SVSVSTEG**RR**GPWSGITGLGDSGIVDGWGPHGHG**R**HGHGPLGHGLHG**R**HGGLGPLGSLAGIGSLGDSGIVDGLGPLGLGP**R**GL**RR**GG**RR**GGSGSWSSEGPGGIYGPGGIYGPGGVYGTDGGYYPDGLYGDSGVVDGYGPYGHYGGV**R**HP**R**G**K**VS**K**SASVSYEQIVGPTVIT**R**YSASASVS**R**E**RR**PIY**RR**PVIVS**R**P**R**VA**K**SVSVSYE**R**IVTPTVIT**R**YSASASVS**R**E**RR**PIY**RR**PIVTYS**R**SVSVSTEG**RR**GPWSGITGLGDSGIVDGWGPHGHGHLGHGPLGHGLHG**R**HGGLGPLGSLAGIGSLGDSGIVDGLGPLGLGP**R**GL**RR**GG**RR**GGSGSWSSEGPGGIYGPGGIYGPGGVYGTDGGYYPDGLYGDSGVVDGYGPYGHYGGV**R**HP**R**G**K**VS**K**SASVSYEQIVGPTVIT**R**YSASASVS**R**E**RR**PIY**RR**PVIVS**R**P**R**VA**K**SVSVSYE**R**IVTPTVIT**R**YSASASVS**R**E**RR**PIY**RR**PVIVS**R**P**R**VA**K**SVSVSYE**R**IVTPTVIT**R**YSASASVS**R**E**RR**PIY**RR**PIVTYS**R**SVSVSTEG**RR**GPWSGITGLGDSGIVDGWGPHGHG**RR**GHGPLGHGLHG**R**HGGLGPLGSLAGIGSLGDSGIVDGLGPLGLGP**R**GL**RR**GG**RR**GGSGSWSSEGPAGIYGPGGIYGPGGVYGTDGGYYPDGLYGDSGVVDGYGPYGHYGGV**R**HP**R**G**K**VS**K**SASVSYEQIVGPTVIT**R**YSASASVS**R**E**RR**PIY**RR**PIVTYS**R**SVSVSTEG**RR**GPWSGITGLGDSGIVDGWGPHGHG**R**HGHGPLGHGLHG**R**HGGLGPLGSLAGIGSLGDSGIVDGLGPLGLGP**R**GL**RR**GG**RR**GGSGSWSSEGPGGIYGPGGIYGPGGVYGTDGGYYPDGLYGDSGVVDGYGPYGHYGGV**R**HP**R**G**K**VS**K**SASVSYEQIVGPTVIT**R**YSASASVS**R**E**RR**PIY**RR**PVIVS**R**P**R**VA**K**SVSVSYE**R**IVTPTVIT**R**YSASASVS**R**E**RR**PIY**RR**PIVTYS**R**SVSVSTEG**RR**GPWSGITGLGDSGIVDGWGPHGHGHLGHGPLGHGLHG**R**HGGLGPLGSLAGIGSLGDSGIVDGLGPLGLGP**R**GL**RR**GG**RR**GGSGSWSSEGPGGIYGPGGIYGPGGVYGTDGGYYPDGLYGDSGVVDGYGPYGHYGGV**R**HP**R**G**K**VS**K**SASVSYEQIVGPTVIT**R**YSASASVS**R**E**RR**PIY**RR**PIVTYS**R**SVSVSTEG**RR**GPWSGITGLGDSGIVDGWGPHGHG**R**HGHGPLGHGLHG**R**HGGLGPLGSLAGIGSLGDSGIVDGLGPLGLGP**R**GL**RR**GG**RR**GGSGSWSSEGPGGIYGPGGIYGPGGVYGTDGGYYPDGLYGDSGVVDGYGPYGHYGGV**R**HP**R**G**K**VS**K**SASVSYEQIVGPTVIT**R**YSASASVS**R**E**RR**PIY**RR**PVIVS**R**P**R**VA**K**SVSVSYE**R**IVTPTVIT**R**YSASASVS**R**E**RR**PIY**RR**PIVTYS**R**SVSVSTEG**RR**GPWSGITGLGDSGIVDGWGPHGHGHLGHGPLGHGLHG**R**HGGLGPLGSLAGIGSLGDSGIVDGLGPLGLGP**R**GL**RR**GG**RR**GGSGSWSSEGPGGIYGPGGIYGPGGVYGTDGGYYPDGLYGDSGVVDGYGPYGHYGGV**R**HP**R**G**K**VS**K**SASVSYEQIVGPTVIT**R**YSASASVS**R**E**RR**PIY**RR**PIVTYS**R**SVSVSTEG**RR**GPWSGITGLGDSGIVDGWGPHGHG**R**HGHGPLGHGLHG**R**HGGLGPLGSLAGIGSLGDSGIVDGLGPLGLGP**R**GL**RR**GG**RR**GGSGSWSSEGPGGIYGPGGIYGPGGVYGTDGGYYPDGLYGDSGVVDGYGPYGHYGGV**R**HP**R**G**K**VS**K**SASVSYEQIVGPTVIT**R**YSASASVS**R**E**RR**PIY**RR**PVIVS**R**P**R**VA**K**SVSVSYE**R**IVTPTVIT**R**YSASASVS**R**E**RR**PIY**RR**PIVTYS**R**SVSVSTEG**RR**GPWSGITGLGDSGIVDGWGPHGHGHLGHGPLGHGLHG**R**HGGLGPLGSLAGIGSLGDSGIVDGLGPLGLGP**R**GL**RR**GG**RR**GGSGSWSSEGPGGIYGPGGIYGPGGVYGTDGGYYPDGLYGDSGVVDGYGPYGHYGGV**R**HP**R**G**K**VS**K**SASVSYEQIVGPTVIT**R**YSASASVS**R**E**RR**PIY**RR**PIVTYS**R**SVSVSTEG**RR**GPWSGITGLGDSGIVDGWGPHGHG**R**HGHGPLGHGLHG**R**HGGLGPLGSLAGIGSLGDSGIVDGLGPLGLGP**R**GL**RR**GG**RR**GGSGSWSSEGPGGIYGPGGIYGPGGVYGTDGGYYPDGLYGDSGVVDGYGPYGHYGGV**R**HP**R**G**K**VS**K**SASVSYEQIVGPTVIT**R**YSASASVS**R**E**RR**PIY**RR**PVIVS**R**P**R**VA**K**SVSVSYE**R**IVTPTVIT**R**YSASASVS**R**E**RR**PIY**RR**PIVTYS**R**SVSVSTEG**RR**GPWSGITGLGDSGIVDGWGPHGHGHLGHGPLGHGLHG**R**HGGLGPLGSLAGIGSLGDSGIVDGLGPLGLGP**R**GL**RR**GG**RR**GGSGSWSSEGPGGIYGPGGIYGPGGVYGTDGGYYPDGLYGDSGVVDGYGPYGHYGGV**R**HP**R**G**K**VS**K**SASVSYEQIVGPTVIT**R**YSASASVS**R**E**RR**PIY**RR**PIVTYS**R**SVSVSTEG**RR**GPWSGITGLGDSGIVDGWGPHGHGHLGHGPLGHGLHG**R**HGGLGPLGSLAGIGSLGDSGIVDGLGPLGLGP**R**GL**RR**GG**RR**GGSGSWSSEGPGGIYGPGGIYGPGGVYGTDGGYYPDGLYGDSGVVDGYGPYGHYGGV**R**HP**R**G**K**VS**K**SASVSYEQIVGPTVIT**R**YSASASVS**R**E**RR**PIY**RR**PIVTYS**R**SVSVSTEG**RR**GPWSGITGLGDSGIVDGWGPHGHGHLGHGPLGHGLHG**R**HGGLGPLGSLAGIGSLGDSGIVDGLGPLGLGP**R**GL**RR**GG**RR**GGSGSWSSEGPGGIYGPGGIYGPGGVYGTDGGYYPDGLYGDSGVVDGYGPYGHYGGV**R**HP**R**G**K**VS**K**SASVSYEQIVGPTVIT**R**YSASASVS**R**E**RR**PIY**RR**PVIVS**R**P**R**VA**K**SVSVSYE**R**IVTPTVIT**R**YSASASVS**R**E**RR**PIY**RR**PIVTS**R**SVSVSTEG**RR**GPWSGITGLGDSGIVDGWGPHGHGHLGHGPLGHGLHG**R**HGGLGPLGSLAGIGSLGDSGIVDGLGPLGLGP**R**GL**RR**GG**RR**GGSGSWSSEGPGGIYGPGGIYGPGGVYGTDGGYYPDGLYGDSGVVDGYGPYGHYGGV**R**HP**R**G**K**VS**K**SASVSYEQIVGPTVIT**R**YSASASVS**R**E**RR**PIY**RR**PIVTYS**R**SVSVSTEG**RR**GPWSGITGLGDSGIVDGWGPHGHG**R**HGHGPLGHGLHG**R**HGGLGPLGSLAGIGSLGDSGIVDGLGPLGLGP**R**GL**RR**GG**RR**GGSGSWSSEGPGGIYGPGGIYGPGGVYGTDGGYYPDGLYGDSGVVDGYGPYGHYGGV**R**HP**R**G**K**VS**K**SASVSYEQIVGPTVIT**R**YSASASVS**R**E**RR**PIY**RR**PIVTYS**R**SVSVSTEG**RR**GPWSGITGLGDSGIVDGWGPHGHG**R**HGHGPLGHGLHG**R**HGGLGPLGSLAGIGSLGDSGIVDGLGPLGLGP**R**GL**RR**GG**RR**GGSGSWSSEGPGGIYGPGGIYGPGGVYGTDGGYYPDGLYGDSGVVDGYGPYGHYGGV**R**HP**R**G**K**VS**K**SASVSYEQIVGPTVIT**R**YSASASVS**R**E**RR**PIY**RR**PVIVS**R**P**R**VA**K**SVSVSYE**R**IVTPTVIT**R**YSASASVS**R**E**RR**PIY**RR**PIVTYS**R**SVSVSTEG**RR**GPWSGITGLGDSGIVDGWGPHGHGHLGHGPLGHGLHG**R**HGGLGPLGSLAGIGSLGDSGIVDGLGPLGLGP**R**GL**RR**GG**RR**GGSGSWSSEGPGGIYGPGGIYGPGGVYGTDGGYYPDGLYGDSGVVDGYGPYGHYGGV**R**HP**R**G**K**VS**K**SASVSYEQIVGPTVIT**R**YSASASVS**R**E**RR**PIY**RR**PIVTYS**R**SVSVSTEG**RR**GPWSGITGLGDSGIVDGWGPHGHG**R**HGHGPLGHGLHG**R**HGGLGPLGSLAGIGSLGDSGIVDGLGPLGLGP**R**GL**RR**GG**RR**GGSGSWSSEGPGGIYGPGGIYGPGGVYGTDGGYYPDGLYGDSGVVDGYGPYGHYGGV**R**HP**R**G**K**VS**K**SASVSYEQIVGPTVIT**R**YSASASVS**R**E**RR**PIY**RR**PVIVS**R**P**R**VA**K**SVSVSYE**R**IVTPTVIT**R**YSASASVS**R**E**RR**PIY**RR**PIVTYS**R**SVSVSTEG**RR**GPWSGITGLGDSGIVDGWGPHGHGHLGHGPLGHGLHG**R**HGGLGPLGSLAGIGSLGDSGIVDGLGPLGLGP**R**GL**RR**GG**RR**GGSGSWSSEGPGGIYGPGGIYGPGGVYGTDGGYYPDGLYGDSGVVDGYGPYGHYGGV**R**HP**R**G**K**VS**K**SASVSYEQIVGPTVIT**R**YSASASVS**R**E**RR**PIY**RR**PIVTYS**R**SVSVSTEG**RR**GPWSGITGLGDSGIVDGWGPHGHG**R**HGHGPLGHGLHG**R**HGGLGPLGSLAGIGSLGDSGIVDGLGPLGLGP**R**GL**RR**GG**RR**GGSGSWSSEGPGGIYGPGGIYGPGGVYGTDGGYYPDVLYGDSGVVDGYGPYGHYGGV**R**HP**R**G**K**VS**K**SASVSYEQIVGPTVIT**R**YSASASVS**R**E**RR**PIYT**R**PVIVS**R**P**R**VA**K**SVSVSYE**R**IVTPTIIT**K**VH**K**SVSES**R**EAPVIY**RR**PVIVS**R**P**R**VA**K**SVSVSYE**R**IVTPTVIT**R**YSASASVS**R**E**RR**PIY**RR**PIVTYS**R**SVSVSTEG**RR**GPWSGITGLGDSGIVDGWGPHGHG**RR**GHGPLGHGLHG**R**HGGLGPLGSLAGIGSLGDSGIVDGLGPLGLGP**R**GL**RR**GG**RR**GGSGSWSSEGPGGIYGPGGIYGPGVYGDSGIVDGLGPLGLGP**R**GL**RR**GG**RR**GGSGSWSSEGPGGIYGPGGIYGPGVYGDSGIVDGLGPLGLGP**R**GL**RR**GG**RR**GGSGSWSSEGPGGIYGPGGIYGPGGIYGPGVYGDSGIVDGLGPLGLGP**R**GL**RR**GG**RR**GGSGSWSSEGPGGIYGPGGIYGPGVYADSGIVDGLGPLGLGP**R**GL**RR**GG**RR**GGSGSWSSEGPGGIYGPGGIYGPGGVYGTDGGYYPDVLYGDSGVVDGYGPYGHYGGV**R**HP**R**G**K**VS**K**SASVSYE**R**IVTPTVIT**R**YSASASVS**R**E**RR**PIYT**R**PVIVS**R**P**R**VA**K**SVSVSYE**R**IVTPTIIT**K**VH**K**SVSES**R**EAPVIY**RR**PVIVS**R**P**R**VA**K**SVSVSYE**R**IVTPTIIT**K**VH**K**SVSES**R**EAPVIY**RR**PVIVS**R**P**R**VA**K**SVSVSYE**R**IVTPTVIT**R**YSASASVS**R**E**RR**PIY**RR**PIVTYS**R**SVSVSIEGS**RRRR**GPLSGITGLCDSGIIDSLGPLGVGP**R**GLGLGG**RRR**GPG**S**W**S**TEGP**R**GLVLGG**RRR**GPG**S**W**S**SEGPG**R**IYGPSGVYGPGV**Y**GD**S**GIVDGLGPLGLGP**R**GLGLGG**RRR**GPSSW**SS**EGPGAVYGGGSLGDYDGGYD**GLVNVGGARVVPGTSVYTTHPDPRTVLKSCKSSPYQLLIKVGNTRKSNGNC***

**Underline bold** = secretion signal peptide

**Dotted underline bold** = non-repetitive termini conserved amongst known caddisworm H-fibroin sequences.

**R** and **K** = trypsin digest sites

Yellow highlight = tryptic peptides from non-repetitive sequence regions. The first residue after the N-terminal cleavage site is included in the highlighted region. Many of the highlighted regions comprise adjacent or overlapping tryptic peptides.

Green highlight = tryptic peptides from repetitive sequence regions. The first residue after the N-terminal cleavage site is included in the highlighted region. Many of the highlighted regions comprise adjacent or overlapping tryptic peptides.

**S** = phosphorylated serines in non-repeating sequence. Phosphorylated serines in the repetitive region are not indicated, and instead are shown in figure 6.

***** = stop codon
